# Supplementary material for: A molecular phylogeny of the Chinese Sinopoda spiders (Sparassidae, Heteropodinae): implications for taxonomy
Source: PeerJ. 2021 Aug 20;9:e11775. doi: 10.7717/peerj.11775 (PMC8381878; doi:10.7717/peerj.11775)
Supplement: Supplemental Information 1 [file peerj-09-11775-s001.xlsx]

## Sheet: Sheet1
			Voucher and DNA locus information. Specimen and locus information is provided below. All others refer to sequences that were previously deposited in GenBank by other authors.
Family	Genera	Species	GenBank Accession N.						Coding	Country	localities	Latitude	Longitude	Altitude
			COI	28S	16S	H3	18S	ITS2
Sparassidae	Barylestis	Barylestis occidentalis	KJ408721	KJ408621	KJ408576	KJ408681	#	#	SD754	Togo
Sparassidae	Pandercetes	Pandercetes spSD662	KJ408765	KJ408664	KJ408606	KJ408709	#	#	SD662	Thailand	Trat Prov., Ko Chang, Khlong Plu school
Sparassidae	Pseudopoda	Pseudopoda confusa	KJ408771	KJ408670	#	KJ408712	#	#	SD175	Laos	Luang Nam Tha Prov., Luang Nam Tha, Ban Tavan Mai
Sparassidae	Pseudopoda	Pseudopoda prompta	KJ408772	KJ408671	#	#	#	#	SD706	India	Uttarakhand, Joshimath
Sparassidae	Heteropoda	Heteropoda davidbowie	KJ408747	KJ408647	KJ408592	KJ408697	#	#	SD436	Malaysia	Cameron Highlands
Sparassidae	Heteropoda	Heteropoda languida	KJ408746	KJ408646	KJ408591	KJ408696	#	#	SD763	Laos	Champasak Province, Pakse, That Fane
Sparassidae	Heteropoda	Heteropoda venatoria	KY017920	#	KY016118	KY018429	KY016705	#	ARAMR000159	Dominican Republic	East of La Romana
Sparassidae	Heteropoda	Heteropoda jugulans	KF442811	KF372790	KF372700	KF442886	#	KF432881	LR54
Sparassidae	Heteropoda	Heteropoda jugulans	KF442812	KF372791	KF372701	KF442887	#	KF432880	LR55
Sparassidae	Heteropoda	Heteropoda jugulans	KF442813	KF372792	KF372702	KF442888	#	KF432879	LR56
Sparassidae	Heteropoda	Heteropoda renibulbis	KF442814	KF372793	KF372704	KF442889	#	#	LR69
Sparassidae	Heteropoda	Heteropoda renibulbis	KF442815	KF372794	KF372705	KF442890	#	#	LR70
Sparassidae	Spariolenus	Spariolenus iranomaximus	KJ408777	JX137224	KJ408615	KJ408716	#	#	SD618	Iran	Ilam Prov., Dehloran, Khofash cave
Sparassidae	Sinopoda	Sinopoda abstrusa	MZ159259	MZ159981	#	MZ265419	#	MZ160045	S5404	China	Shannan City, Jiacha County, Anrao Town, Tibet	29.14°N	92.59°E	3431m
Sparassidae	Sinopoda	Sinopoda aequalis	MZ159260	MZ159982	MZ160149	MZ265420	#	MZ160046	S2308	China	Luoyang City, Luanchuan County, Chongdugou Scenic Area, Henan Province	33.94°N	110.65°E	640m
Sparassidae	Sinopoda	Sinopoda altissima	MZ159261	MZ159983	MZ160150	MZ265421	MZ160108	MZ160047	S2022	China	Lanping County, Erwushan Scenic Area, Yunnan Province	26.44°N	99.41°E	2560m
Sparassidae	Sinopoda	Sinopoda altissima	MZ159262	MZ159984	MZ160151	MZ265422	MZ160109	MZ160048	S2023	China	Deqin County, Gusong Town, Yunnan Province	28.49°N	98.91°E	3348m
Sparassidae	Sinopoda	Sinopoda altissima	MZ159263	MZ159985	MZ160152	MZ265423	MZ160110	MZ160049	S2025	China	Weixi County, Wenchang Pagoda Scenic Area, Yunnan Province	27.18°N	99.29°E	2281m
Sparassidae	Sinopoda	Sinopoda anguina	MZ159264	MZ159986	MZ160153	MZ265424	MZ160111	MZ160050	S2087	China	Nujiang Lisu Autonomous Prefecture,Gongshan County, Aduodi Village, Yunnan Province	27.74°N	98.66°E	1645m
Sparassidae	Sinopoda	Sinopoda anguina	MZ159265	MZ159987	MZ160154	MZ265425	MZ160112	MZ160051	S2088	China	Puladi Township, Gongshan County, Yunnan Province	27.58°N	98.78°E	1400m
Sparassidae	Sinopoda	Sinopoda anguina	MZ159266	MZ159988	MZ160155	MZ265426	MZ160113	MZ160052	S2091	China	Baoshan City, Taibao Park, Yunnan Province	25.12°N	99.16°E	1704m
Sparassidae	Sinopoda	Sinopoda apiculiformis	MZ159267	MZ159989	MZ160156	MZ265427	#	MZ160053	S5013	China	Hengyang City, Hengyang County, Hengshan Scenic Area, Hunan Province	27.28°N	112.70°E	610m
Sparassidae	Sinopoda	Sinopoda brevis	MZ159268	MZ159990	MZ160157	MZ265428	#	MZ160054	S2191	China	Zhuanghe City, Xidashan Scenic Area, Liaoning Province	39.70°N	122.95°E	53m
Sparassidae	Sinopoda	Sinopoda brevis	MZ159269	MZ159991	MZ160158	MZ265429	#	MZ160055	S2302	China	Dalian City, Daheishan Scenic Area, Liaoning Province	39.09°N	121.78°E	290m
Sparassidae	Sinopoda	Sinopoda campanacea	MZ159272	MZ159994	MZ160161	MZ265432	#	MZ160058	S2316	China	Baoji City, Meixian County, Tangyu Town, Taibai Mountain National Forest Park, Shaixi Province	34.06°N	107.89°E	1340m
Sparassidae	Sinopoda	Sinopoda campanacea	MZ159270	MZ159992	MZ160159	MZ265430	#	MZ160056	S5026	China	Changde City, Hupingshan National Nature Reserve, Hunan Province	30.11°N	110.78°E	1395m
Sparassidae	Sinopoda	Sinopoda campanacea	MZ159271	MZ159993	MZ160160	MZ265431	#	MZ160057	S5076	China	Zhangjiajie City, Tianpingshan Scenic Area, Hunan Province	29.79°N	110.09°E	1503 m
Sparassidae	Sinopoda	Sinopoda cochlearia	MZ159273	#	MZ160162	MZ265433	MZ160114	MZ160059	S2045	China	Jinggangshan City, Ciping Town, Jinggangshan Revolutionary Martyrs Cemetery, Jiangxi Province	26.58°N	114.17°E	867m
Sparassidae	Sinopoda	Sinopoda columnaris	MZ159274	#	#	MZ265434	#	MZ160060	S0476	China	Zunyi City, Suiyang County, Kuankuo Town, Dishui Village, Manwang Cave, Guizhou Province	28.78°N	107.90°E	734m
Sparassidae	Sinopoda	Sinopoda dehiscens	MZ159275	MZ159995	#	MZ265435	#	MZ160061	S2144	China	Huaihua City, Mayang County, Pantian Village, Hunan Province	27.63°N	109.64°E	558m
Sparassidae	Sinopoda	Sinopoda erromena	#	MZ159996	#	MZ265436	#	MZ160062	S2074	China	Yiyang City, Anhua County, Liubuxi National Nature Reserve, Hunan Province	28.36°N	110.85°E	522 m
Sparassidae	Sinopoda	Sinopoda fasciculata	MZ159277	MZ159998	MZ160164	MZ265438	MZ160116	MZ160064	S2051	China	Xiangxi Tujia and Miao Autonomous Prefecture, Baojing County, Baiyun Temple, Hunan Province	29.17°N	109.57°E	1061m
Sparassidae	Sinopoda	Sinopoda fasciculata	MZ159278	MZ159999	MZ160165	MZ265439	MZ160117	MZ160065	S2075	China	Yiyang City, Anhua County, Liubuxi National Nature Reserve, Hunan Province	28.36°N	110.85°E	522 m
Sparassidae	Sinopoda	Sinopoda fasciculata	MZ159276	MZ159997	MZ160163	MZ265437	MZ160115	MZ160063	S2109	China	Tongren City, Jiangkou County, Fangjingshan National Nature Reserve, Maochaohe, Guizhou Province	27.90°N	108.75°E	693m
Sparassidae	Sinopoda	Sinopoda globosa	MZ159279	MZ160000	MZ160166	MZ265440	MZ160118	MZ160066	S2165	China	Hanzhong City, Lueyang County, Wulongdong Scenic Area, Shaanxi Province	33.60°N	106.31°E	1786m
Sparassidae	Sinopoda	Sinopoda globosa	MZ159280	MZ160001	MZ160167	MZ265441	MZ160119	MZ160067	S2201	China	Guangyuan City, Qingchuan County, Qingxi Town, Sijiaowan Village, Sichuan Province	32.64°N	104.82°E	2038m
Sparassidae	Sinopoda	Sinopoda globosa	MZ159281	MZ160002	MZ160168	MZ265442	MZ160120	MZ160068	S2204	China	Guangyuan City, Qingchuan County, Motianling Scenic Area, Sichuan Province	32.63°N	104.85°E	1826m
Sparassidae	Sinopoda	Sinopoda grandispinosa	MZ159282	MZ160003	MZ160169	MZ265443	MZ160121	MZ160069	S2054	China	Jianfengling National Nature Reserve, Hainan Province	18.74°N	109.84°E	874m
Sparassidae	Sinopoda	Sinopoda grandispinosa	MZ159283	MZ160004	MZ160170	MZ265444	MZ160122	MZ160070	S2056	China	Main Peak of Wuzhishan, Hainan Province	18.90°N	109.70°E	1614m
Sparassidae	Sinopoda	Sinopoda grandispinosa	MZ159284	MZ160005	MZ160171	MZ265445	MZ160123	MZ160071	S2057	China	Limu Mountain National Nature Reserve, Hainan Province	19.18°N	109.75°E	1060m
Sparassidae	Sinopoda	Sinopoda guangyuanensis	#	MZ160006	MZ160172	MZ265446	#	#	S2221	China	Guangyuan City, Qingchuan County, Qingxi Town, Sichuan Province	32.47°N	104.83°E	1028m
Sparassidae	Sinopoda	Sinopoda hamata	#	MZ160007	#	MZ265447	#	MZ160072	S2133	China	Yaan City, Yingjing County, Yunfengshan Scenic Area, Yunfeng Temple, Sichuan Province	29.77°N	102.87°E	1034 m
Sparassidae	Sinopoda	Sinopoda horizontalis	#	#	MZ160173	MZ265448	MZ160124	MZ160073	S2081	China	Wuyishan City, Wuyishan National Nature Reserve, Fujian Province	27.58°N	117.48°E	1152m
Sparassidae	Sinopoda	Sinopoda improcera	MZ159285	MZ160008	MZ160174	MZ265449	#	MZ160074	S2040	China	Linjiapu, Qushi Town, Yunnan Province	26.28°N	98.70°E	2352m
Sparassidae	Sinopoda	Sinopoda improcera	MZ159286	MZ160009	MZ160175	MZ265450	#	MZ160075	S2041	China	Tengchong County, Houqiao Town, Danzha Village, Langya Mountain, Yunnan Province	25.49°N	98.27°E	2032m
Sparassidae	Sinopoda	Sinopoda improcera	MZ159287	MZ160010	MZ160176	MZ265451	#	MZ160076	S2042	China	Tengchong County, Ruidian Town, Yunfengshan Scenic Area, Yunnan Province	25.38°N	98.41°E	1897m
Sparassidae	Sinopoda	Sinopoda koreana	JN817232	JN817019	JN816598	#	#	#	LEGO_41_1	Korea	Boryeong-Si, Misan-Myeon, Yongsu-Ri	36.26°N	126.68°E	137m
Sparassidae	Sinopoda	Sinopoda lata	MZ159288	MZ160011	#	MZ265452	#	MZ160077	S2039	China	Lincang City, Wulaoshan Forest Park, Yunnan Province	23.91°N	100.17°E	2362m
Sparassidae	Sinopoda	Sinopoda liui	MZ159289	MZ160012	MZ160177	MZ265453	#	MZ160078	S0167	China	Sanming City, Jiangle County, Longxishan Nature Reserve, Fujian Province	26.40°N	117.22°E	985m
Sparassidae	Sinopoda	Sinopoda longiducta	MZ159290	MZ160013	#	MZ265454	MZ160125	MZ160079	S2120	China	Yaan City, Yingjing County, Longcanggou National Nature Reserve, Sichuan Province	29.61°N	102.90°E	1581m
Sparassidae	Sinopoda	Sinopoda longiducta	MZ159291	MZ160014	#	MZ265455	MZ160126	MZ160080	S2126	China	Yaan City, Baoxing County, Fengtongzhai National Nature Reserve, Sichuan Province	30.57°N	102.88°E	1603m
Sparassidae	Sinopoda	Sinopoda longshan	MZ159293	MZ160016	MZ160179	MZ265457	MZ160128	MZ160082	S2061	China	Enshi Tujia and Miao Autonomous Prefecture, Lichuan City, Maoba Township, Xingdoushan Nature Reserve, Hubei Province	30.13°N	109.00°E	1333m
Sparassidae	Sinopoda	Sinopoda longshan	MZ159292	MZ160015	MZ160178	MZ265456	MZ160127	MZ160081	S2062	China	Tongren City, Jiangkou County, Fanjingshan National Nature Reserve, Menghuan River, Guizhou Province	27.85°N	108.78°E	541m
Sparassidae	Sinopoda	Sinopoda longshan	MZ159294	MZ160017	MZ160180	MZ265458	MZ160129	MZ160083	S2063	China	Huaihua City, Ruanling County, Jiemuxi National Nature Reserve, Hunan Province	28.88°N	110.44°E	431m
Sparassidae	Sinopoda	Sinopoda mamillata	MZ159295	MZ160018	MZ160181	MZ265459	MZ160130	MZ160084	S2059	China	Baoshan City, Tengchong County, Houqiao Town, Langyashan Mountain, Yunnan Province	25.49°N	98.28°E	2119m
Sparassidae	Sinopoda	Sinopoda mamillata	MZ159296	MZ160019	MZ160182	MZ265460	MZ160131	MZ160085	S2094	China	Monument to the Anti-Japanese Heroes in Pianma Town, Lushui County, Yunnan Province	26.02°N	98.63°E	2062m
Sparassidae	Sinopoda	Sinopoda mamillata	MZ159297	MZ160020	MZ160183	MZ265461	MZ160132	MZ160086	S2096	China	Baoshan City,Tengchong County, Ruidian Town, Yunfengshan Park, Yunnan Province	25.38°N	98.41°E	2252m
Sparassidae	Sinopoda	Sinopoda nuda	MZ159298	MZ160021	#	MZ265462	MZ160133	MZ160087	S2117	China	Zunyi City, Suiyang County, Hot Spring Town, Shuanghe Village, Luojiao Cave, Guizhou Province	28.24°N	107.29°E	673m
Sparassidae	Sinopoda	Sinopoda nuda	MZ159299	MZ160022	#	MZ265463	MZ160134	MZ160088	S2142	China	Tongren City, Yanhe Tujia Autonomous County, Siqu Town, Hongyan Village, Zhujiadong, Guizhou Province	28.64°N	108.30°E	583m
Sparassidae	Sinopoda	Sinopoda ovata	MZ159300	MZ160023	MZ160184	MZ265464	#	MZ160089	S2295	China	Jindaoxia Scenic Area, Chongqing Province	30.04°N	106.63°E	871m
Sparassidae	Sinopoda	Sinopoda pengi	MZ159301	MZ160024	MZ160185	MZ265465	MZ160135	MZ160090	S2002	China	Kunming City, Xishan Scenic Area, Yunnan Province	24.95°N	102.62°E	1950m
Sparassidae	Sinopoda	Sinopoda pengi	MZ159302	MZ160025	MZ160186	MZ265466	MZ160136	MZ160091	S2005	China	Dali Bai Autonomous Prefecture, Jianchuan County, Qianshishan Scenic Area, Yunnan Province	26.54°N	99.88°E	2320m
Sparassidae	Sinopoda	Sinopoda pengi	MZ159303	MZ160026	MZ160187	MZ265467	MZ160137	MZ160092	S2015	China	Dali Bai Autonomous Prefecture, Baolin Temple, Yunnan Province	25.61°N	100.20°E	2031m
Sparassidae	Sinopoda	Sinopoda pyramidalis	MZ159304	MZ160027	MZ160188	MZ265468	#	#	S2224	China	Bazhong City, Nanjiang County, Guangwushan Scenic Area, Sichuan Province	32.67°N	106.80°E	1003m
Sparassidae	Sinopoda	Sinopoda serpentembolus	MZ159307	MZ160030	MZ160191	#	#	MZ160095	S2327	China	Baoji City, Meixian County, Tangyu Town, Taibai Mountain National Forest Park, Shaixi Province	34.06°N	107.89°E	1340m
Sparassidae	Sinopoda	Sinopoda serpentembolus	MZ159305	MZ160028	MZ160189	#	#	MZ160093	S2329	China	Nanyang City, Neixiang County, Baotianman National Forest Park, Henan Province	33.50°N	111.93°E	1300m
Sparassidae	Sinopoda	Sinopoda serpentembolus	MZ159306	MZ160029	MZ160190	#	#	MZ160094	S2333	China	Luoyang City, Luanchuan County, Laojunshan Scenic Area, Henan Province	33.74°N	110.64°E	860m
Sparassidae	Sinopoda	Sinopoda stellatops	JN817233	JN817020	JN816599	#	#	#	LEGO_41_2	Korea	Jeju-si, Jeju-do	33.50°N	126.53°E	61m
Sparassidae	Sinopoda	Sinopoda tengchongensis	MZ159309	MZ160032	MZ160192	#	MZ160138	MZ160096	S2031	China	Dali Bai Autonomous Prefecture, Yongping County, Tianshenmiao Scenic Area, Yunnan Province	25.45°N	99.53°E	1607m
Sparassidae	Sinopoda	Sinopoda tengchongensis	MZ159310	MZ160033	MZ160193	#	MZ160139	MZ160097	S2032	China	Laifengshan Forest Park, Tengchong County, Yunnan Province	25.02°N	98.48°E	1929m
Sparassidae	Sinopoda	Sinopoda tengchongensis	MZ159308	MZ160031	#	MZ265469	#	#	S2210	China	Mingfeng Valley, Jianfengling National Nature Reserve, Hainan Province	18.74°N	108.85°E	960m
Sparassidae	Sinopoda	Sinopoda tham	KJ408776	KJ408614	KJ408776	KJ408715	#	#	SD787	Laos	Tham Na Thong Cave, Namor District, Oudomxay Province	20.54°N	101.14°E	800m
Sparassidae	Sinopoda	Sinopoda triangula	MZ159311	MZ160034	#	#	MZ160140	MZ160098	S2107	China	Liupanshui City, Panzhou County, Biyun Cave, Guizhou Province	25.78°N	104.64°E	1468m
Sparassidae	Sinopoda	Sinopoda tumefacta	MZ159312	MZ160035	MZ160194	MZ265470	#	MZ160099	S2034	China	Hani-Yi Autonomous Prefecture of Honghe, Gejiu City, Laoyinshan Scenic Area, Yunnan Province	23.36°N	103.16°E	1955m
Sparassidae	Sinopoda	Sinopoda tumefacta	MZ159313	MZ160036	MZ160195	MZ265471	#	MZ160100	S2067	China	Hani-Yi Autonomous Prefecture of Honghe, Gejiu City, Pingbian County, Daweishan Scenic Area, Yunnan Province	22.92°N	103.70°E	2068m
Sparassidae	Sinopoda	Sinopoda wangi	MZ159314	MZ160037	#	MZ265472	MZ160141	#	S2178	China	Kangxian County, Baiyun Mountain, Gansu Province	33.33°N	105.60°E	1201m
Sparassidae	Sinopoda	Sinopoda wuyiensis	MZ159315	MZ160038	MZ160196	MZ265473	MZ160142	MZ160101	S2072	China	Wuyishan City, Wuyishan Nature Reserve, Tongmu Village, Fujian Province	27.74°N	117.68°E	712m
Sparassidae	Sinopoda	Sinopoda wuyiensis	MZ159316	MZ160039	MZ160197	MZ265474	MZ160143	MZ160102	S2073	China	Longyan City, Meihua Mountain Nature Reserve, Fujian Province	25.34°N	116.83°E	700m
Sparassidae	Sinopoda	Sinopoda yaanensis	MZ159317	MZ160040	#	MZ265475	MZ160144	MZ160103	S2123	China	Yaan City, Yingjing County, Longcanggou National Nature Reserve, Sichuan Province	29.61°N	102.90°E	1581m
Sparassidae	Sinopoda	Sinopoda yaanensis	MZ159319	MZ160042	#	MZ265477	MZ160146	MZ160105	S2139	China	Zhaotong City, Daguan County, Huanglianhe Scenic Area, Yunnan Province	27.73°N	103.92°E	1558m
Sparassidae	Sinopoda	Sinopoda yaanensis	MZ159318	MZ160041	#	MZ265476	MZ160145	MZ160104	S2151	China	Yingjing County, Yunfeng Mountain, Yunfeng Temple, Sichuan Province	29.77°N	102.87°E	1034 m
Sparassidae	Sinopoda	Sinopoda yanlingensis	MZ159321	MZ160044	MZ160199	MZ265479	MZ160148	MZ160107	S2049	China	Jinggangshan City, Ciping Town, Jinggangshan Revolutionary Martyrs Cemetery, Jiangxi Province	26.58°N	114.17°E	867 m
Sparassidae	Sinopoda	Sinopoda yanlingensis	MZ159320	MZ160043	MZ160198	MZ265478	MZ160147	MZ160106	S5003	China	Chenzhou City, Yanling County, Shenlonggu Forest Park, Hunan Province	26.52°N	114.01°E	1350 m

## Sheet: Sheet2
Sparassidae	Sinopoda	Sinopoda erromena	#	S2074
Sparassidae	Sinopoda	Sinopoda guangyuanensis	#	S2221
Sparassidae	Sinopoda	Sinopoda hamata	#	S2133
Sparassidae	Sinopoda	Sinopoda horizontalis	#	S2081
Sparassidae	Sinopoda	Sinopoda koreana	JN817232	LEGO_41_1
Sparassidae	Sinopoda	Sinopoda stellatops	JN817233	LEGO_41_2
Sparassidae	Sinopoda	Sinopoda tham	KJ408776	SD787
Sparassidae	Sinopoda	Sinopoda abstrusa		S5404
Sparassidae	Sinopoda	Sinopoda aequalis		S2308
Sparassidae	Sinopoda	Sinopoda altissima		S2022
Sparassidae	Sinopoda	Sinopoda altissima		S2023
Sparassidae	Sinopoda	Sinopoda altissima		S2025
Sparassidae	Sinopoda	Sinopoda anguina		S2087
Sparassidae	Sinopoda	Sinopoda anguina		S2088
Sparassidae	Sinopoda	Sinopoda anguina		S2091
Sparassidae	Sinopoda	Sinopoda apiculiformis		S5013
Sparassidae	Sinopoda	Sinopoda brevis		S2191
Sparassidae	Sinopoda	Sinopoda brevis		S2302
Sparassidae	Sinopoda	Sinopoda campanacea		S2316
Sparassidae	Sinopoda	Sinopoda campanacea		S5026
Sparassidae	Sinopoda	Sinopoda campanacea		S5076
Sparassidae	Sinopoda	Sinopoda cochlearia		S2045
Sparassidae	Sinopoda	Sinopoda columnaris		S0476
Sparassidae	Sinopoda	Sinopoda dehiscens		S2144
Sparassidae	Sinopoda	Sinopoda fasciculata		S2051
Sparassidae	Sinopoda	Sinopoda fasciculata		S2075
Sparassidae	Sinopoda	Sinopoda fasciculata		S2109
Sparassidae	Sinopoda	Sinopoda globosa		S2165
Sparassidae	Sinopoda	Sinopoda globosa		S2201
Sparassidae	Sinopoda	Sinopoda globosa		S2204
Sparassidae	Sinopoda	Sinopoda grandispinosa		S2054
Sparassidae	Sinopoda	Sinopoda grandispinosa		S2056
Sparassidae	Sinopoda	Sinopoda grandispinosa		S2057
Sparassidae	Sinopoda	Sinopoda improcera		S2040
Sparassidae	Sinopoda	Sinopoda improcera		S2041
Sparassidae	Sinopoda	Sinopoda improcera		S2042
Sparassidae	Sinopoda	Sinopoda lata		S2039
Sparassidae	Sinopoda	Sinopoda liui		S0167
Sparassidae	Sinopoda	Sinopoda longiducta		S2120
Sparassidae	Sinopoda	Sinopoda longiducta		S2126
Sparassidae	Sinopoda	Sinopoda longshan		S2061
Sparassidae	Sinopoda	Sinopoda longshan		S2062
Sparassidae	Sinopoda	Sinopoda longshan		S2063
Sparassidae	Sinopoda	Sinopoda mamillata		S2059
Sparassidae	Sinopoda	Sinopoda mamillata		S2094
Sparassidae	Sinopoda	Sinopoda mamillata		S2096
Sparassidae	Sinopoda	Sinopoda nuda		S2117
Sparassidae	Sinopoda	Sinopoda nuda		S2142
Sparassidae	Sinopoda	Sinopoda ovata		S2295
Sparassidae	Sinopoda	Sinopoda pengi		S2002
Sparassidae	Sinopoda	Sinopoda pengi		S2005
Sparassidae	Sinopoda	Sinopoda pengi		S2015
Sparassidae	Sinopoda	Sinopoda pyramidalis		S2224
Sparassidae	Sinopoda	Sinopoda serpentembolus		S2327
Sparassidae	Sinopoda	Sinopoda serpentembolus		S2329
Sparassidae	Sinopoda	Sinopoda serpentembolus		S2333
Sparassidae	Sinopoda	Sinopoda tengchongensis		S2031
Sparassidae	Sinopoda	Sinopoda tengchongensis		S2032
Sparassidae	Sinopoda	Sinopoda tengchongensis		S2210
Sparassidae	Sinopoda	Sinopoda triangula		S2107
Sparassidae	Sinopoda	Sinopoda tumefacta		S2034
Sparassidae	Sinopoda	Sinopoda tumefacta		S2067
Sparassidae	Sinopoda	Sinopoda wangi		S2178
Sparassidae	Sinopoda	Sinopoda wuyiensis		S2072
Sparassidae	Sinopoda	Sinopoda wuyiensis		S2073
Sparassidae	Sinopoda	Sinopoda yaanensis		S2123
Sparassidae	Sinopoda	Sinopoda yaanensis		S2139
Sparassidae	Sinopoda	Sinopoda yaanensis		S2151
Sparassidae	Sinopoda	Sinopoda yanlingensis		S2049
Sparassidae	Sinopoda	Sinopoda yanlingensis		S5003

## Sheet: Sheet3
Sparassidae	Sinopoda	Sinopoda abstrusa		S5404
Sparassidae	Sinopoda	Sinopoda aequalis		S2308
Sparassidae	Sinopoda	Sinopoda altissima		S2022
Sparassidae	Sinopoda	Sinopoda altissima		S2023
Sparassidae	Sinopoda	Sinopoda altissima		S2025
Sparassidae	Sinopoda	Sinopoda anguina		S2087
Sparassidae	Sinopoda	Sinopoda anguina		S2088
Sparassidae	Sinopoda	Sinopoda anguina		S2091
Sparassidae	Sinopoda	Sinopoda apiculiformis		S5013
Sparassidae	Sinopoda	Sinopoda brevis		S2191
Sparassidae	Sinopoda	Sinopoda brevis		S2302
Sparassidae	Sinopoda	Sinopoda campanacea		S2316
Sparassidae	Sinopoda	Sinopoda campanacea		S5026
Sparassidae	Sinopoda	Sinopoda campanacea		S5076
Sparassidae	Sinopoda	Sinopoda cochlearia		S2045
Sparassidae	Sinopoda	Sinopoda columnaris		S0476
Sparassidae	Sinopoda	Sinopoda dehiscens		S2144
Sparassidae	Sinopoda	Sinopoda fasciculata		S2051
Sparassidae	Sinopoda	Sinopoda fasciculata		S2075
Sparassidae	Sinopoda	Sinopoda fasciculata		S2109
Sparassidae	Sinopoda	Sinopoda globosa		S2165
Sparassidae	Sinopoda	Sinopoda globosa		S2201
Sparassidae	Sinopoda	Sinopoda globosa		S2204
Sparassidae	Sinopoda	Sinopoda grandispinosa		S2054
Sparassidae	Sinopoda	Sinopoda grandispinosa		S2056
Sparassidae	Sinopoda	Sinopoda grandispinosa		S2057
Sparassidae	Sinopoda	Sinopoda improcera		S2040
Sparassidae	Sinopoda	Sinopoda improcera		S2041
Sparassidae	Sinopoda	Sinopoda improcera		S2042
Sparassidae	Sinopoda	Sinopoda lata		S2039
Sparassidae	Sinopoda	Sinopoda liui		S0167
Sparassidae	Sinopoda	Sinopoda longiducta		S2120
Sparassidae	Sinopoda	Sinopoda longiducta		S2126
Sparassidae	Sinopoda	Sinopoda longshan		S2061
Sparassidae	Sinopoda	Sinopoda longshan		S2062
Sparassidae	Sinopoda	Sinopoda longshan		S2063
Sparassidae	Sinopoda	Sinopoda mamillata		S2059
Sparassidae	Sinopoda	Sinopoda mamillata		S2094
Sparassidae	Sinopoda	Sinopoda mamillata		S2096
Sparassidae	Sinopoda	Sinopoda nuda		S2117
Sparassidae	Sinopoda	Sinopoda nuda		S2142
Sparassidae	Sinopoda	Sinopoda ovata		S2295
Sparassidae	Sinopoda	Sinopoda pengi		S2002
Sparassidae	Sinopoda	Sinopoda pengi		S2005
Sparassidae	Sinopoda	Sinopoda pengi		S2015
Sparassidae	Sinopoda	Sinopoda pyramidalis		S2224
Sparassidae	Sinopoda	Sinopoda serpentembolus		S2327
Sparassidae	Sinopoda	Sinopoda serpentembolus		S2329
Sparassidae	Sinopoda	Sinopoda serpentembolus		S2333
Sparassidae	Sinopoda	Sinopoda tengchongensis		S2031
Sparassidae	Sinopoda	Sinopoda tengchongensis		S2032
Sparassidae	Sinopoda	Sinopoda tengchongensis		S2210
Sparassidae	Sinopoda	Sinopoda triangula		S2107
Sparassidae	Sinopoda	Sinopoda tumefacta		S2034
Sparassidae	Sinopoda	Sinopoda tumefacta		S2067
Sparassidae	Sinopoda	Sinopoda wangi		S2178
Sparassidae	Sinopoda	Sinopoda wuyiensis		S2072
Sparassidae	Sinopoda	Sinopoda wuyiensis		S2073
Sparassidae	Sinopoda	Sinopoda yaanensis		S2123
Sparassidae	Sinopoda	Sinopoda yaanensis		S2139
Sparassidae	Sinopoda	Sinopoda yaanensis		S2151
Sparassidae	Sinopoda	Sinopoda yanlingensis		S2049
Sparassidae	Sinopoda	Sinopoda yanlingensis		S5003

## Sheet: Sheet4
Sparassidae	Sinopoda	Sinopoda abstrusa	MZ159271	S5404
Sparassidae	Sinopoda	Sinopoda aequalis	MZ159269	S2308
Sparassidae	Sinopoda	Sinopoda altissima	MZ159303	S2022
Sparassidae	Sinopoda	Sinopoda altissima	MZ159261	S2023
Sparassidae	Sinopoda	Sinopoda altissima	MZ159262	S2025
Sparassidae	Sinopoda	Sinopoda anguina	MZ159278	S2087
Sparassidae	Sinopoda	Sinopoda anguina	MZ159264	S2088
Sparassidae	Sinopoda	Sinopoda anguina	MZ159265	S2091
Sparassidae	Sinopoda	Sinopoda apiculiformis	MZ159320	S5013
Sparassidae	Sinopoda	Sinopoda brevis	MZ159314	S2191
Sparassidae	Sinopoda	Sinopoda brevis	MZ159300	S2302
Sparassidae	Sinopoda	Sinopoda campanacea	MZ159260	S2316
Sparassidae	Sinopoda	Sinopoda campanacea	MZ159267	S5026
Sparassidae	Sinopoda	Sinopoda campanacea	MZ159270	S5076
Sparassidae	Sinopoda	Sinopoda cochlearia	MZ159287	S2045
Sparassidae	Sinopoda	Sinopoda columnaris	MZ159289	S0476
Sparassidae	Sinopoda	Sinopoda dehiscens	MZ159299	S2144
Sparassidae	Sinopoda	Sinopoda fasciculata	MZ159321	S2051
Sparassidae	Sinopoda	Sinopoda fasciculata	MZ159316	S2075
Sparassidae	Sinopoda	Sinopoda fasciculata	MZ159311	S2109
Sparassidae	Sinopoda	Sinopoda globosa	MZ159318	S2165
Sparassidae	Sinopoda	Sinopoda globosa	MZ159268	S2201
Sparassidae	Sinopoda	Sinopoda globosa	MZ159280	S2204
Sparassidae	Sinopoda	Sinopoda grandispinosa	MZ159277	S2054
Sparassidae	Sinopoda	Sinopoda grandispinosa	MZ159282	S2056
Sparassidae	Sinopoda	Sinopoda grandispinosa	MZ159283	S2057
Sparassidae	Sinopoda	Sinopoda improcera	MZ159288	S2040
Sparassidae	Sinopoda	Sinopoda improcera	MZ159285	S2041
Sparassidae	Sinopoda	Sinopoda improcera	MZ159286	S2042
Sparassidae	Sinopoda	Sinopoda lata	MZ159312	S2039
Sparassidae	Sinopoda	Sinopoda liui	Accession	S0167
Sparassidae	Sinopoda	Sinopoda longiducta	MZ159298	S2120
Sparassidae	Sinopoda	Sinopoda longiducta	MZ159317	S2126
Sparassidae	Sinopoda	Sinopoda longshan	MZ159295	S2061
Sparassidae	Sinopoda	Sinopoda longshan	MZ159293	S2062
Sparassidae	Sinopoda	Sinopoda longshan	MZ159292	S2063
Sparassidae	Sinopoda	Sinopoda mamillata	MZ159284	S2059
Sparassidae	Sinopoda	Sinopoda mamillata	MZ159266	S2094
Sparassidae	Sinopoda	Sinopoda mamillata	MZ159296	S2096
Sparassidae	Sinopoda	Sinopoda nuda	MZ159276	S2117
Sparassidae	Sinopoda	Sinopoda nuda	MZ159319	S2142
Sparassidae	Sinopoda	Sinopoda ovata	MZ159304	S2295
Sparassidae	Sinopoda	Sinopoda pengi	MZ159274	S2002
Sparassidae	Sinopoda	Sinopoda pengi	MZ159301	S2005
Sparassidae	Sinopoda	Sinopoda pengi	MZ159302	S2015
Sparassidae	Sinopoda	Sinopoda pyramidalis	MZ159308	S2224
Sparassidae	Sinopoda	Sinopoda serpentembolus	MZ159272	S2327
Sparassidae	Sinopoda	Sinopoda serpentembolus	MZ159307	S2329
Sparassidae	Sinopoda	Sinopoda serpentembolus	MZ159305	S2333
Sparassidae	Sinopoda	Sinopoda tengchongensis	MZ159263	S2031
Sparassidae	Sinopoda	Sinopoda tengchongensis	MZ159309	S2032
Sparassidae	Sinopoda	Sinopoda tengchongensis	MZ159281	S2210
Sparassidae	Sinopoda	Sinopoda triangula	MZ159297	S2107
Sparassidae	Sinopoda	Sinopoda tumefacta	MZ159310	S2034
Sparassidae	Sinopoda	Sinopoda tumefacta	MZ159294	S2067
Sparassidae	Sinopoda	Sinopoda wangi	MZ159279	S2178
Sparassidae	Sinopoda	Sinopoda wuyiensis	MZ159313	S2072
Sparassidae	Sinopoda	Sinopoda wuyiensis	MZ159315	S2073
Sparassidae	Sinopoda	Sinopoda yaanensis	MZ159290	S2123
Sparassidae	Sinopoda	Sinopoda yaanensis	MZ159291	S2139
Sparassidae	Sinopoda	Sinopoda yaanensis	MZ159275	S2151
Sparassidae	Sinopoda	Sinopoda yanlingensis	MZ159273	S2049
Sparassidae	Sinopoda	Sinopoda yanlingensis	MZ159306	S5003
			MZ159259
